# Supplementary material for: Exploring the views of female genital mutilation survivors, their male partners and healthcare professionals on the timing of deinfibulation surgery and NHS FGM care provision (the FGM Sister Study): protocol for a qualitative study
Source: PubMed Central journal article supplement (PMC6803147; doi:10.1136/bmjopen-2019-034140), 2019-10-17
Supplement: bmjopen-2019-034140supp001.pdf [file bmjopen-2019-034140supp001.pdf]

## Supplementary file 1: Female Genital Mutilation Survivors Discussion Guide (Work Package 1a)

| Focus                      | <i>Objective(s)</i> and key discussion points (nb. these are not direct questions)                                                                                                                                                                                                                                                                                                                                                                                                                                             |
|----------------------------|--------------------------------------------------------------------------------------------------------------------------------------------------------------------------------------------------------------------------------------------------------------------------------------------------------------------------------------------------------------------------------------------------------------------------------------------------------------------------------------------------------------------------------|
| FGM                        | <i>1a. to explore knowledge, awareness and understanding of FGM and deinfibulation</i>                                                                                                                                                                                                                                                                                                                                                                                                                                         |
|                            | <p>Explore preferred terminology around FGM</p> <p>Explore understanding of FGM</p> <p>Explore culture of and attitudes around FGM within their community/home country</p> <p>Explore culture of and attitudes around FGM within the UK/receiving county (including FGM law in the UK/protection orders)</p> <p>Explore personal experiences and impacts of FGM</p> <p>Explore views, experiences and impacts of FGM on others (e.g. partner, wider family)</p>                                                                |
| Deinfibulation             | <i>1a. to explore knowledge, awareness and understanding of <del>FGM and</del> deinfibulation</i>                                                                                                                                                                                                                                                                                                                                                                                                                              |
|                            | <i>1b. to elicit views on preferences for the timing of deinfibulation and the rationale for these</i>                                                                                                                                                                                                                                                                                                                                                                                                                         |
|                            | <i>1c. to explore perspectives on the decision making process around deinfibulation</i>                                                                                                                                                                                                                                                                                                                                                                                                                                        |
|                            | <p>Explore preferred terminology around re-opening surgery (deinfibulation)</p> <p>Explore cultural meaning of re-opening surgery (deinfibulation) within their community</p> <p>Explore their views on re-opening surgery (deinfibulation)</p> <p>Explore personal experiences of re-opening surgery (deinfibulation)</p> <p>Explore personal decision making process around re-opening surgery (deinfibulation)</p> <p>Explore preferences for timing of re-opening surgery (deinfibulation) (e.g. when, where, who how)</p> |
| FGM - related care seeking | <i>1d. to explore knowledge, awareness, and experiences of FGM services and support</i>                                                                                                                                                                                                                                                                                                                                                                                                                                        |
|                            | <i>1e. to understand the enablers, motivators and barriers to FGM care seeking behaviours</i>                                                                                                                                                                                                                                                                                                                                                                                                                                  |

|                                       |                                                                                                                                                                                                                                                                                                                                                                                                                                                                                                                                       |
|---------------------------------------|---------------------------------------------------------------------------------------------------------------------------------------------------------------------------------------------------------------------------------------------------------------------------------------------------------------------------------------------------------------------------------------------------------------------------------------------------------------------------------------------------------------------------------------|
|                                       | <p>Explore experiences of accessing FGM-related care (including re-opening surgery (deinfibulation)) in home country</p> <p>Explore experiences of accessing FGM-related care (including re-opening surgery (deinfibulation)) in UK/receiving country</p> <p>Explore awareness of local (UK) FGM services</p> <p>Explore enablers/motivators for accessing FGM-related care (including re-opening surgery (deinfibulation))</p> <p>Explore barriers to accessing FGM-related care (including re-opening surgery (deinfibulation))</p> |
| Future NHS FGM-related care provision | <p><i>1g. to understand how FGM care services could be improved to best meet the needs of FGM-survivors, their families and HCPs who support them in their local context</i></p>                                                                                                                                                                                                                                                                                                                                                      |
|                                       | <p>Explore what services/support/interventions should be offered to FGM-survivors and their families (e.g. what, where, who)</p> <p>Explore how current local FGM services could be improved</p> <p>Explore what services can do to support FGM-survivors and their families</p>                                                                                                                                                                                                                                                      |

FGM: Female Genital Mutilation
