# Supplementary material for: Exploring the views of female genital mutilation survivors, their male partners and healthcare professionals on the timing of deinfibulation surgery and NHS FGM care provision (the FGM Sister Study): protocol for a qualitative study
Source: PubMed Central journal article supplement (PMC6803147; doi:10.1136/bmjopen-2019-034140), 2019-10-17
Supplement: bmjopen-2019-034140supp004.pdf [file bmjopen-2019-034140supp004.pdf]

**Supplementary file 4: Alignment of the Framework Approach<sup>1</sup> with the stages of the Sound of 'Silence' conceptual framework<sup>2</sup> and our approach to data collection and analysis**

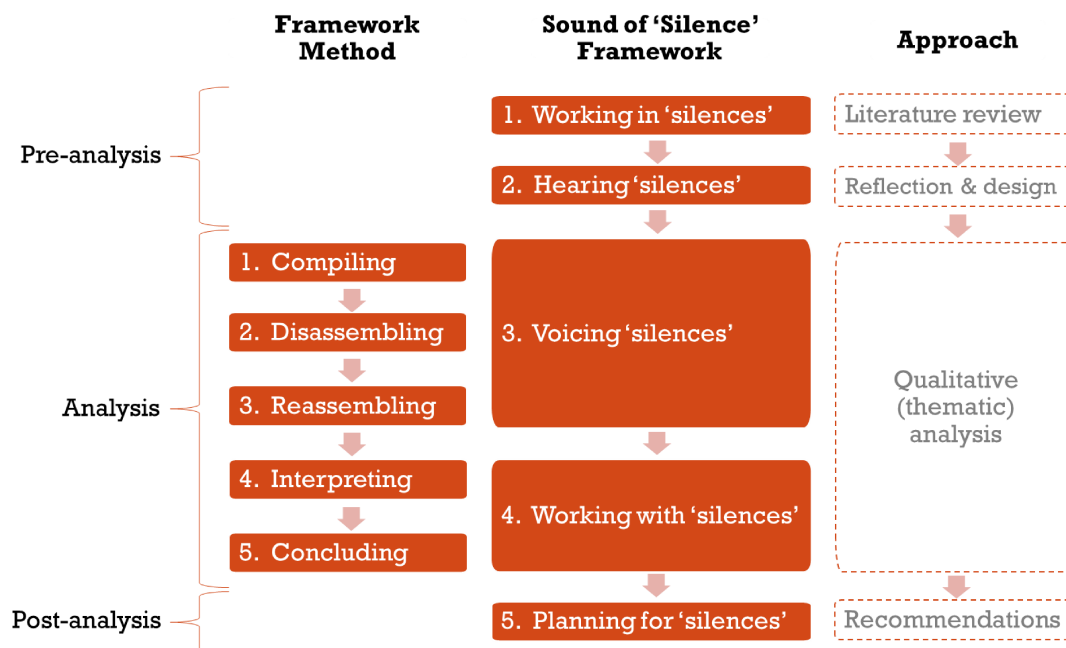

**Supplementary file 4 references adapted from:**

<sup>1</sup> Castleberry A, Nolen A. Thematic analysis of qualitative research data: Is it as easy as it sounds? *Curr Pharm Teach Learn* 2018;10(6):807-15. doi: 10.1016/j.cptl.2018.03.019 [published Online First: 2018/07/22]

<sup>2</sup> Serrant-Green L. The sound of 'silence': a framework for researching sensitive issues or marginalised perspectives in health. *Journal of Research Nursing* 2011;16(4)
