# Supplementary material for: Exploring the views of female genital mutilation survivors, their male partners and healthcare professionals on the timing of deinfibulation surgery and NHS FGM care provision (the FGM Sister Study): protocol for a qualitative study
Source: BMJ Open. 2019 Oct 17;9(10):e034140. doi: 10.1136/bmjopen-2019-034140 (PMC6803147; doi:10.1136/bmjopen-2019-034140)
Supplement: Supplementary data [file bmjopen-2019-034140supp003.pdf]

### Supplementary file 3: Healthcare Professionals Discussion Guide (Work Package 1c)

| Focus                      | <i>Objective(s)</i> and key discussion points (nb. these are not direct questions)                                                                                                                                                                                                                                                                                                                                                                                                                                                                                                              |
|----------------------------|-------------------------------------------------------------------------------------------------------------------------------------------------------------------------------------------------------------------------------------------------------------------------------------------------------------------------------------------------------------------------------------------------------------------------------------------------------------------------------------------------------------------------------------------------------------------------------------------------|
| FGM                        | <i>1a. to explore knowledge, awareness and understanding of FGM and deinfibulation</i>                                                                                                                                                                                                                                                                                                                                                                                                                                                                                                          |
|                            | <p>Explore awareness and knowledge of terminology around FGM</p> <p>Explore understanding of FGM and FGM types</p> <p>Explore understanding of culture and attitudes around FGM within the UK and FGM-affected countries)</p> <p>Explore understanding of impacts/consequences of FGM for survivors and wider family members (e.g. male partners and children)</p> <p>Explore awareness around and attitudes towards FGM law in the UK/protection orders (including influence on practice)</p> <p>Explore awareness and knowledge of local, national, international FGM guidelines/policies</p> |
| Deinfibulation             | <i>1a. to explore knowledge, awareness and understanding of FGM and deinfibulation</i>                                                                                                                                                                                                                                                                                                                                                                                                                                                                                                          |
|                            | <p><i>1b. to elicit views on preferences for the timing of deinfibulation and the rationale for these</i></p> <p>Explore awareness and knowledge of terminology around deinfibulation</p> <p>Explore understanding of cultural meaning of deinfibulation within UK and FGM-affected communities</p> <p>Explore their personal views on deinfibulation</p> <p>Explore understanding of the outcomes of deinfibulation for FGM-survivors (and their male partners)</p> <p>Explore preferences for timing of deinfibulation (e.g. when, where, who how)</p>                                        |
| FGM-related care provision | <i>1d. to explore knowledge, awareness, and experiences of FGM services and support</i>                                                                                                                                                                                                                                                                                                                                                                                                                                                                                                         |
|                            | <i>1e. to understand the enablers, motivators and barriers to FGM care seeking behaviours</i>                                                                                                                                                                                                                                                                                                                                                                                                                                                                                                   |
|                            | <i>1f. to explore how HCPs describe, explain and reason about their care provision for FGM-survivors and their families</i>                                                                                                                                                                                                                                                                                                                                                                                                                                                                     |

|                                       |                                                                                                                                                                                                                                                                                                                                                                                                                                                                                                                                                                                                                                               |
|---------------------------------------|-----------------------------------------------------------------------------------------------------------------------------------------------------------------------------------------------------------------------------------------------------------------------------------------------------------------------------------------------------------------------------------------------------------------------------------------------------------------------------------------------------------------------------------------------------------------------------------------------------------------------------------------------|
|                                       | <p>Explore experiences of providing FGM-related care (including deinfibulation)</p> <p>Explore awareness of local (UK) FGM-related services (outside of their own experiences including NHS and non-NHS)</p> <p>Explore views on current UK services/support/interventions offered to FGM-survivors and wider family (e.g. what, where, who)</p> <p>Explore perceptions around the enablers/motivators for survivors and their families to accessing FGM-related care (including deinfibulation)</p> <p>Explore perceptions around the barriers for survivors and their families to accessing FGM-related care (including deinfibulation)</p> |
| Future NHS FGM-related care provision | <p><i>1g. to understand how FGM care services could be improved to best meet the needs of FGM-survivors, their families and HCPs who support them in their local context</i></p>                                                                                                                                                                                                                                                                                                                                                                                                                                                              |
|                                       | <p>Explore thoughts on what services/support/interventions should be offered to FGM-survivors and their wider family (e.g. what, where, who)</p> <p>Explore how current UK FGM services could be improved</p> <p>Explore views on whether the UK FGM Law/Protection Orders needs to be changed</p> <p>Explore what services can do to support FGM-survivors and their wider family</p>                                                                                                                                                                                                                                                        |

FGM: Female Genital Mutilation; HCP: Healthcare Professional
